# Supplementary material for: Impact of Grip Strength in Patients with Unresectable Hepatocellular Carcinoma Treated with Lenvatinib
Source: PubMed Central journal article supplement (PMC7465794; doi:10.3390/cancers12082146), 2020-08-03
Supplement: cancers-12-02146-s001.pdf [file cancers-12-02146-s001.pdf]

Supplementary Materials

## Impact of Grip Strength in Patients with Unresectable Hepatocellular Carcinoma Treated with Lenvatinib

**Table S1.** Adverse effects observed in more than 15% of the all patients.

|                              | <b>All Grade</b> | <b>Grade 3/4</b> |
|------------------------------|------------------|------------------|
| Hypertension                 | 22 (34.9%)       | 5 (7.9%)         |
| Thyroid function abnormality | 19 (30.2%)       | 1 (1.6%)         |
| Fatigue                      | 18 (28.6%)       | 1 (1.6%)         |
| Urine protein                | 14 (22.2%)       | 6 (9.5%)         |
| Diarrhea                     | 12 (19.0%)       | 1 (1.6%)         |
| HFSR                         | 11 (17.5%)       | 2 (3.2%)         |
| Appetite loss                | 11 (17.5%)       | 2 (3.2%)         |

HFSR, Hand-foot skin reaction.

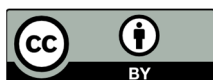

© 2020 by the authors. Licensee MDPI, Basel, Switzerland. This article is an open access article distributed under the terms and conditions of the Creative Commons Attribution (CC BY) license (<http://creativecommons.org/licenses/by/4.0/>).
